# Supplementary material for: Approximate quantum circuit compilation for proton-transfer kinetics on quantum processors
Source: Royal Society of Chemistry journal article supplement (doi:10.1039/d5cp04097c), 2026-01-01
Supplement: d5cp04097c2.pdf [file d5cp04097c2.pdf]

## Supplementary Information

### Movie S1. Adiabatic Proton-Transfer Dynamics in Malonaldehyde

This video presents the reference adiabatic proton-transfer dynamics obtained by integrating the time-dependent Schrödinger equation using a fourth-order Runge–Kutta scheme within the NEO framework.

The **bottom panel** visualizes the **time-resolved proton density**, showing how the quantum proton delocalises and shifts between the Left and Right configurations during the simulated evolution.

The **top panel** contains three diagnostic plots evaluated at each simulation frame:

1. **Left plot:** Proton–electron **entanglement entropy**, indicating how nuclear–electronic correlation changes over the course of the adiabatic evolution.
2. **Middle plot:** **Instantaneous energy** of the evolving state with respect to the **Left (blue)**, **Middle (orange)**, and **Right (green)** Hamiltonians.
3. **Right plot:** **State fidelity** relative to the **Left (blue)**, **Middle (orange)**, and **Right (green)** ground states, showing how the evolving wavefunction aligns with each stationary reference state.

Together, these elements provide a detailed picture of proton delocalisation, energetic progression, and wavefunction character throughout the adiabatic proton-transfer process.
